# Supplementary material
Source: PubMed Central journal article supplement (PMC7189153)

**Supplemental Figure 1:**

Asterik (\*) denotes relative location of pedal temperature scan using Exergen dermal thermometer. The temperatures would be performed bilaterally on each patient meeting inclusion and exclusion criteria.

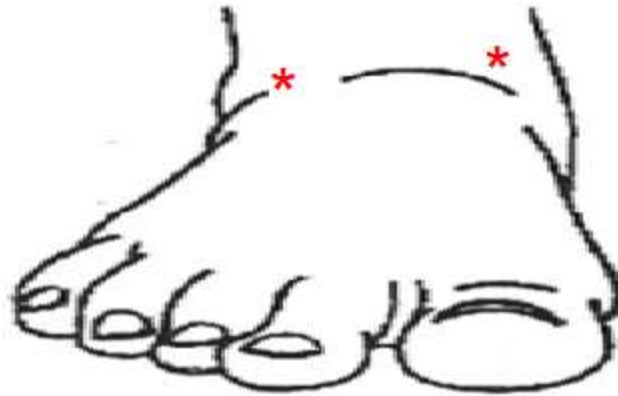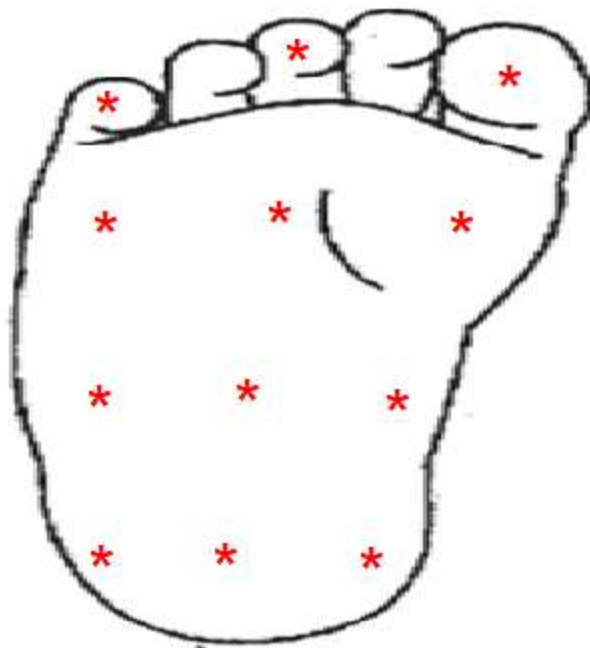

Supplement: Supplemental_Figure_1_Updated.pdf [file Supplemental_Figure_1_Updated.pdf]
